# Supplementary material for: The Last Mile Matters: Impact of Dockless Bike Sharing on Subway Housing Price Premium
Source: Atypon-hosted journal article supplement (doi:10.1287/mnsc.2019.3550), 2020-06-17
Supplement: mnsc.2019.3550.sm1.pdf [file mnsc.2019.3550.sm1.pdf]

# The Last Mile Matters: Impact of Dockless Bike Sharing on Subway Housing Price Premium: Online Appendix

## Online Appendix A. Calculation of Distance to the Nearest Subway Station

An apartment can have more than one record due to upward or downward price adjustments or change in sales status with a time stamp for the change. For each record, we define distance as that between the apartment and the nearest subway station which is open when the price record is created. Seventy percent of the apartments only have one price record. Their distances to subway stations are calculated only once and do not vary with time. But for apartments with multiple records, it is possible their distances to subway will vary with time: The distances typically decrease when a new and closer subway station is built. However, the distances do not change if the new station is further away from the apartment or its opening falls outside the listing period of the apartment. In the follows paragraph we give several examples to illustrate this idea.

As shown in Table A1, suppose Apartment A has three price records [1]-[3], created on May 15, June 15 and July 15, 2017, respectively. Before May 31, 2017, the nearest subway station (S0) to this apartment was 2.5 km away. On June 1, 2017, a new subway line was built, and a new station (S1) 1.5 km away from the apartment came into use. Opening at the same time was another new station (S2) 3.5 km away. Then on September 1, 2017, a third new station (S3) 1 km away came into use. In this case, Apartment A’s three observations [1]-[3] will have different distances to subway: Observation [1]’s distance to subway is 2.5 km. Observation [2]’s distance to subway is 1.5 km (the opening of S2 did not play a role because it was further from A than S0). Finally, Observation [3]’s distance to subway remains 1.5 km, because the nearest station by July 15 was still S1, and the opening of S3 has no effect because it opened after price record [3] was created.

**Table A1. Illustration of how distance is measured**

| Price record date | Open date and distance from Apartment A         |                                             |                                             |                                       |
|-------------------|-------------------------------------------------|---------------------------------------------|---------------------------------------------|---------------------------------------|
|                   | S0                                              | S1                                          | S2                                          | S3                                    |
|                   | (opened before<br>May 15, 2017; 2.5<br>km away) | (opened on June<br>1, 2017; 1.5 km<br>away) | (opened on June<br>1, 2017; 3.5 km<br>away) | (opened on Sep 1,<br>2017; 1 km away) |
| May 15, 2017      | 2.5 km                                          |                                             |                                             |                                       |
| June 15, 2017     |                                                 | 1.5 km                                      |                                             |                                       |
| July 15, 2017     |                                                 |                                             |                                             | 1.5 km                                |

**Figure A1. Distribution of Apartments by Distance to Nearest Subway Station**

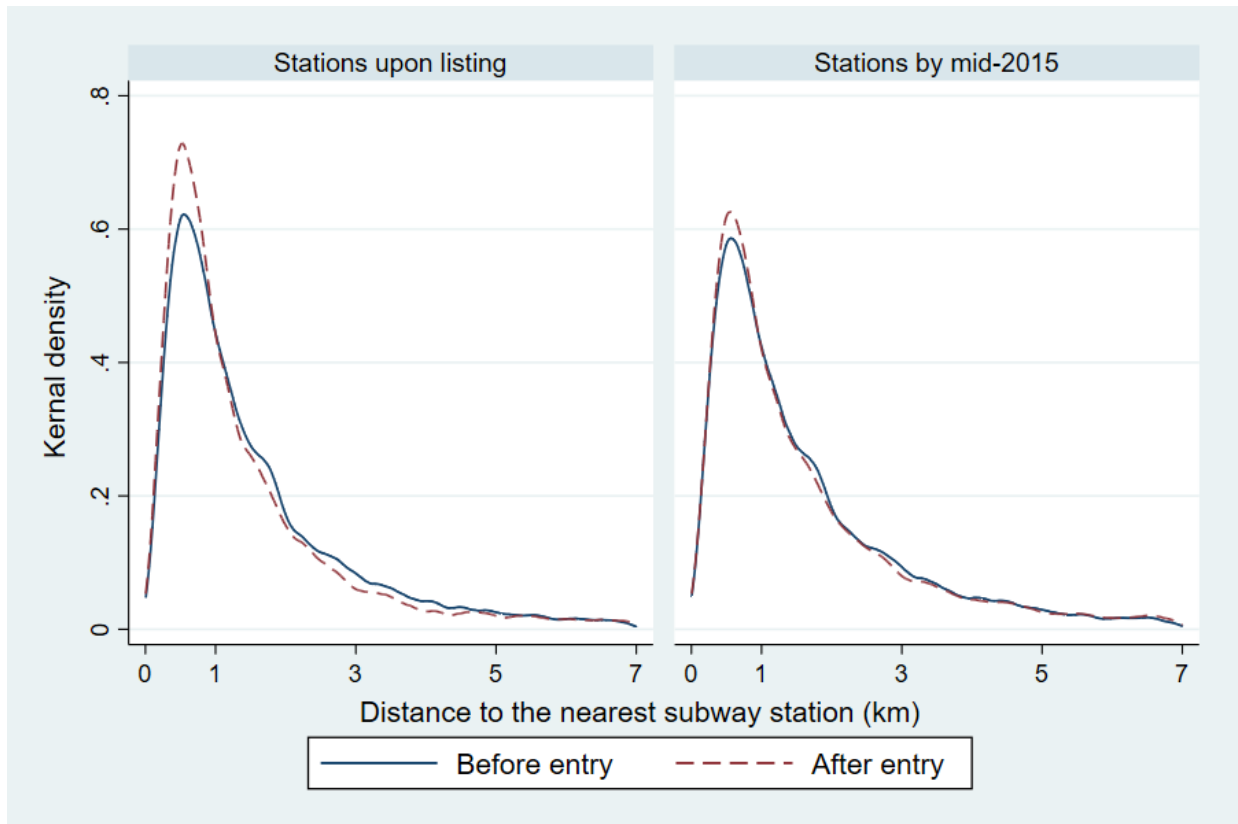

*Note:* Samples comprise apartments initially listed during mid-2015 to 2017, within 7 km to subway. Each apartment is matched to the nearest subway station at the time of listing (the left panel), or at July 1, 2015 (the right panel). The blue solid line and the red dashed line depict the kernel density distribution of apartments before and after the entry of bike sharing against distance to subway, respectively.

## Online Appendix B. Additional Tables and Figures

**Table B1. City Characteristics**

| City      | (a)                     |                    |                    | (b)               |          | (c)          | (d)                   | (e)               | (f)          |
|-----------|-------------------------|--------------------|--------------------|-------------------|----------|--------------|-----------------------|-------------------|--------------|
|           | Bike sharing entry date |                    |                    | # Subway stations |          | # Apartments | Average price         | Average size      | Income per   |
|           | Ofo campus              | Ofo                | Mobike             | Jul 2015          | Dec 2017 |              | (CNY/m <sup>2</sup> ) | (m <sup>2</sup> ) | capita (CNY) |
| Beijing   | 6 Jun 2015              | 10 Oct 2016        | <u>1 Sep 2016</u>  | 265               | 288      | 62,689       | 58,668                | 91.81             | 52,350       |
| Chengdu   | 22 Aug 2016             | 16 Dec 2016        | <u>16 Nov 2016</u> | 48                | 100      | 53,294       | 12,233                | 95.35             | 35,902       |
| Chongqing | 10 Jan 2017             | <u>10 Jan 2017</u> | 1 May 2017         | 108               | 119      | 35,650       | 9,242                 | 97.30             | 29,610       |
| Dalian    | 26 Jun 2017             | 26 Jun 2017        | <u>16 Apr 2017</u> | 41                | 65       | 32,457       | 11,054                | 82.41             | 38,050       |
| Hangzhou  | 12 Sep 2016             | <u>20 Feb 2017</u> | 16 Apr 2017        | 44                | 56       | 19,562       | 27,251                | 93.02             | 52,185       |
| Nanjing   | 22 Aug 2016             | <u>8 Jan 2017</u>  | 12 Jan 2017        | 113               | 128      | 34,073       | 26,247                | 89.02             | 49,997       |
| Shanghai  | 9 May 2016              | 10 Oct 2016        | <u>22 Apr 2016</u> | 279               | 294      | 59,031       | 50,880                | 87.17             | 55,358       |
| Shenzhen  | 11 Sep 2016             | 9 Dec 2016         | <u>16 Oct 2016</u> | 118               | 167      | 37,816       | 54,255                | 86.81             | 48,695       |
| Tianjin   | 27 Aug 2016             | <u>13 Jan 2017</u> | 12 Feb 2017        | 84                | 105      | 29,969       | 26,833                | 77.28             | 34,074       |
| Wuhan     | 18 Apr 2016             | 6 Jan 2017         | <u>29 Dec 2016</u> | 75                | 123      | 35,299       | 15,716                | 102.2             | 39,737       |

*Notes:* Column (a): Entry date of Ofo (campus only), Ofo (citywide) and Mobike (citywide); The first and third columns are from Cao, Jin and Zhou (2018) and the second column is collected from the Internet by authors; In subsequent tables, the entry of bike sharing is defined as the earlier citywide entry of Ofo or Mobike (as underlined). Column (b): Number of subway stations by mid-2015 and the end of 2017, calculated by authors; Columns (c)-(e): Number of apartments, average price per m<sup>2</sup> and average apartment size, calculated from the sample; Column (f): Income per capita in 2016, collected from *China City Statistical Yearbook 2017*, Beijing: China Statistics Press, 2018.

**Table B2. City-specific Coefficient Estimates**

| Variables               | (a)     | (b)      | (c)       | (d)     | (e)      |
|-------------------------|---------|----------|-----------|---------|----------|
|                         | Beijing | Chengdu  | Chongqing | Dalian  | Hangzhou |
| Distance to subway      | -0.055  | -0.039   | -0.008    | -0.057  | -0.037   |
|                         | (0.007) | (0.008)  | (0.007)   | (0.011) | (0.020)  |
| Distance x bike sharing | 0.029   | 0.003    | 0.015     | 0.008   | 0.010    |
|                         | (0.005) | (0.012)  | (0.006)   | (0.006) | (0.015)  |
| Variables               | (f)     | (g)      | (h)       | (i)     | (j)      |
|                         | Nanjing | Shanghai | Shenzhen  | Tianjin | Wuhan    |
| Distance to subway      | -0.025  | -0.065   | -0.023    | -0.069  | -0.047   |
|                         | (0.014) | (0.007)  | (0.009)   | (0.009) | (0.008)  |
| Distance x bike sharing | -0.007  | 0.037    | 0.021     | -0.002  | 0.020    |
|                         | (0.011) | (0.005)  | (0.005)   | (0.005) | (0.006)  |
| Observations            | 617,271 |          |           |         |          |
| Apartments              | 339,840 |          |           |         |          |
| Subway stations         | 1,422   |          |           |         |          |
| $R^2$                   | 0.91    |          |           |         |          |

*Notes:* Estimated by OLS with subway-station fixed effects and year-month fixed effects. Samples comprise apartments initially listed from mid-2015 to 2017, within 3 km of the nearest subway station. The dependent variable is the logarithm of price per m<sup>2</sup>. All estimates control for apartment characteristics, apartment density, and indicators for initial/last price. Robust standard errors clustered by subway station in parentheses.

**Table B3. City-level Estimates**

| Variables               | (a)               | (b)               | (c)               | (d)               | (e)               |
|-------------------------|-------------------|-------------------|-------------------|-------------------|-------------------|
|                         | Beijing           | Chengdu           | Chongqing         | Dalian            | Hangzhou          |
| Distance to subway      | -0.053<br>(0.007) | -0.041<br>(0.008) | -0.009<br>(0.006) | -0.054<br>(0.010) | -0.039<br>(0.020) |
| Distance x bike sharing | 0.030<br>(0.005)  | 0.002<br>(0.011)  | 0.015<br>(0.006)  | 0.004<br>(0.006)  | 0.012<br>(0.015)  |
| Observations            | 105,543           | 84,579            | 53,224            | 55,790            | 33,313            |
| Apartments              | 62,689            | 53,294            | 35,650            | 32,457            | 19,562            |
| Subway stations         | 285               | 100               | 117               | 62                | 56                |
| $R^2$                   | 0.75              | 0.54              | 0.51              | 0.57              | 0.64              |
| Variables               | (f)               | (g)               | (h)               | (i)               | (j)               |
|                         | Nanjing           | Shanghai          | Shenzhen          | Tianjin           | Wuhan             |
| Distance to subway      | -0.024<br>(0.014) | -0.065<br>(0.006) | -0.028<br>(0.008) | -0.068<br>(0.009) | -0.046<br>(0.008) |
| Distance x bike sharing | -0.009<br>(0.011) | 0.036<br>(0.005)  | 0.021<br>(0.005)  | 0.001<br>(0.005)  | 0.017<br>(0.006)  |
| Observations            | 56,564            | 60,681            | 62,419            | 55,045            | 50,113            |
| Apartments              | 34,073            | 59,031            | 37,816            | 29,969            | 35,299            |
| Subway stations         | 121               | 294               | 163               | 102               | 122               |
| $R^2$                   | 0.60              | 0.65              | 0.60              | 0.67              | 0.60              |

*Notes:* Estimated by OLS with subway-station fixed effects and year-month fixed effects. Samples comprise apartments initially listed from mid-2015 to 2017, within 3 km of the nearest subway station. The dependent variable is the logarithm of price per m<sup>2</sup>. All estimates control for apartment characteristics, apartment density, and indicators for initial/last price. Robust standard errors clustered by subway station in parentheses.

**Table B4. Exogenous Entry of Bike Sharing: The Hazard Rate Test**

| Variables                    | (a)               | (b)              |
|------------------------------|-------------------|------------------|
|                              | Coefficients      | Hazard ratios    |
| End-of-year population       | -0.380<br>(1.247) | 0.684<br>(0.853) |
| Annual GDP                   | 1.741<br>(1.779)  | 5.701<br>(10.14) |
| Annual subway ridership      | 4.045<br>(2.416)  | 57.12<br>(138.0) |
| Annual average housing price | 0.613<br>(0.712)  | 1.846<br>(1.314) |
| Observations                 |                   | 125              |
| Cities                       |                   | 10               |
| Log pseudolikelihood         |                   | -13.30           |

*Notes:* Estimated by a hazard rate model using Stata routine, `stcox`. Sample comprises city-year-months from January 2016 to the month of entry of bike sharing. Explanatory variables are standardized to zero mean and unit standard deviation. Column (a) reports the coefficients and column (b) reports the respective hazard ratios. Robust standard errors clustered by city in parentheses.

**Figure B1. Photos of Dockless Shared Bikes in Chinese Cities**

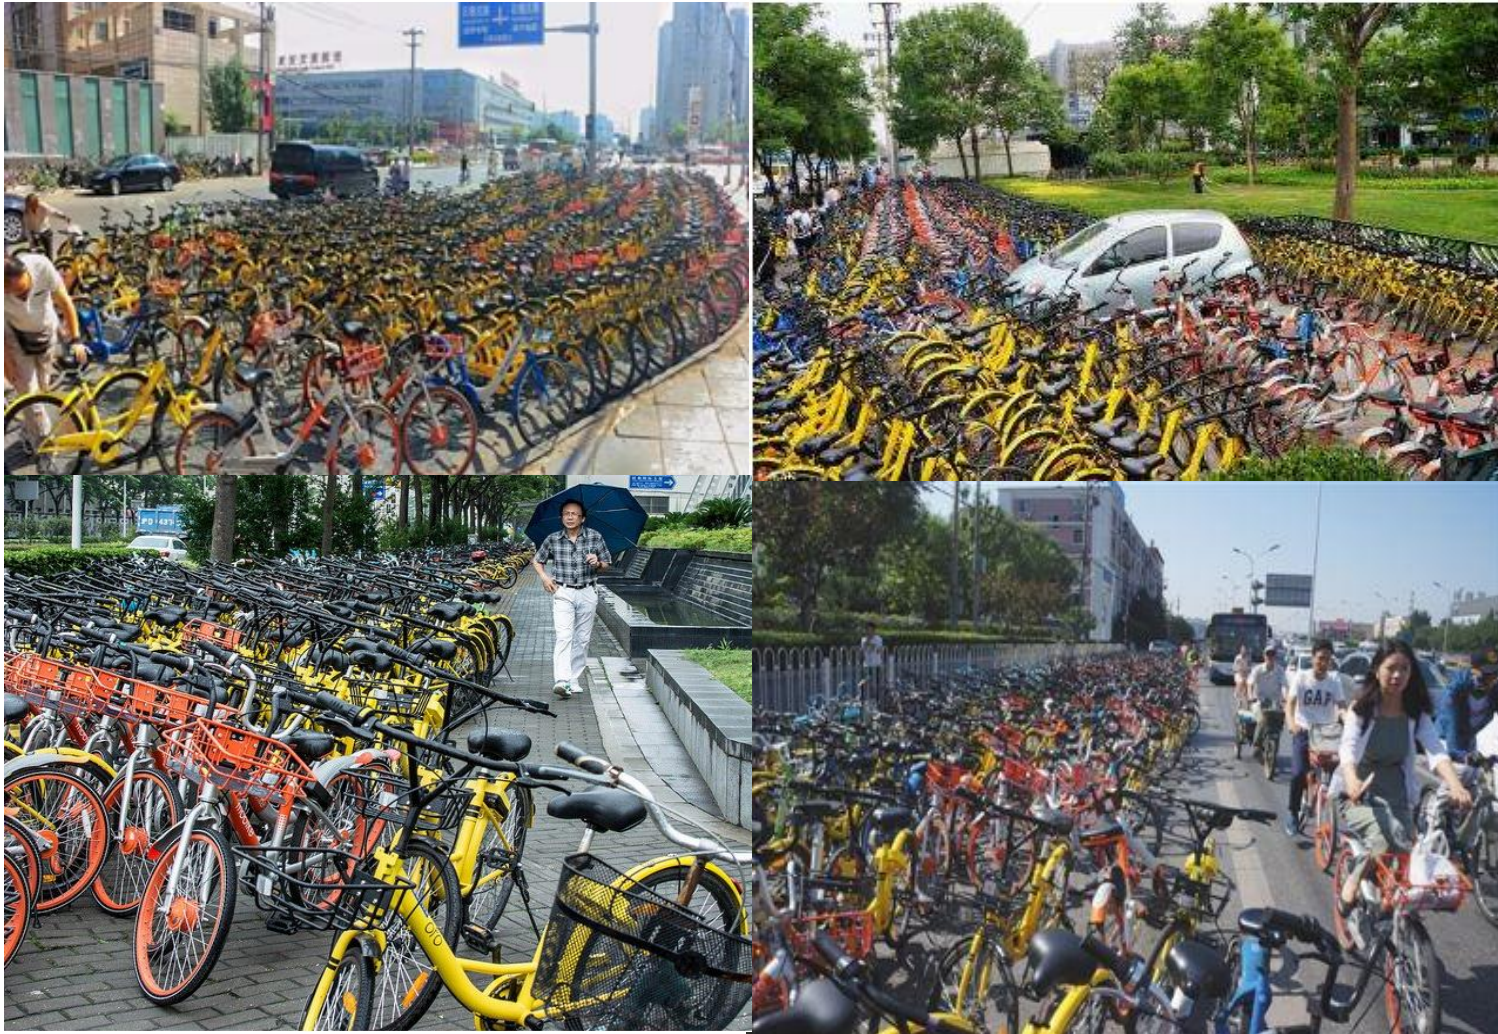

*Source:* Upper-left: <http://www.010lf.com/news/2017/09/11/193632.html>; upper-right: <http://www.jlonline.com/news/2017-0509/357030.shtml>; bottom-left: <https://www.planetizen.com/news/2018/03/97982-friday-eye-candy-dockless-bikes-far-eye-can-see>; bottom-right: [http://www.rmzxb.com.cn/c/2017-08-04/1698939\\_2.shtml](http://www.rmzxb.com.cn/c/2017-08-04/1698939_2.shtml); retrieved May 12, 2018.

**Figure B2. Baidu Index for “Bike Sharing”**

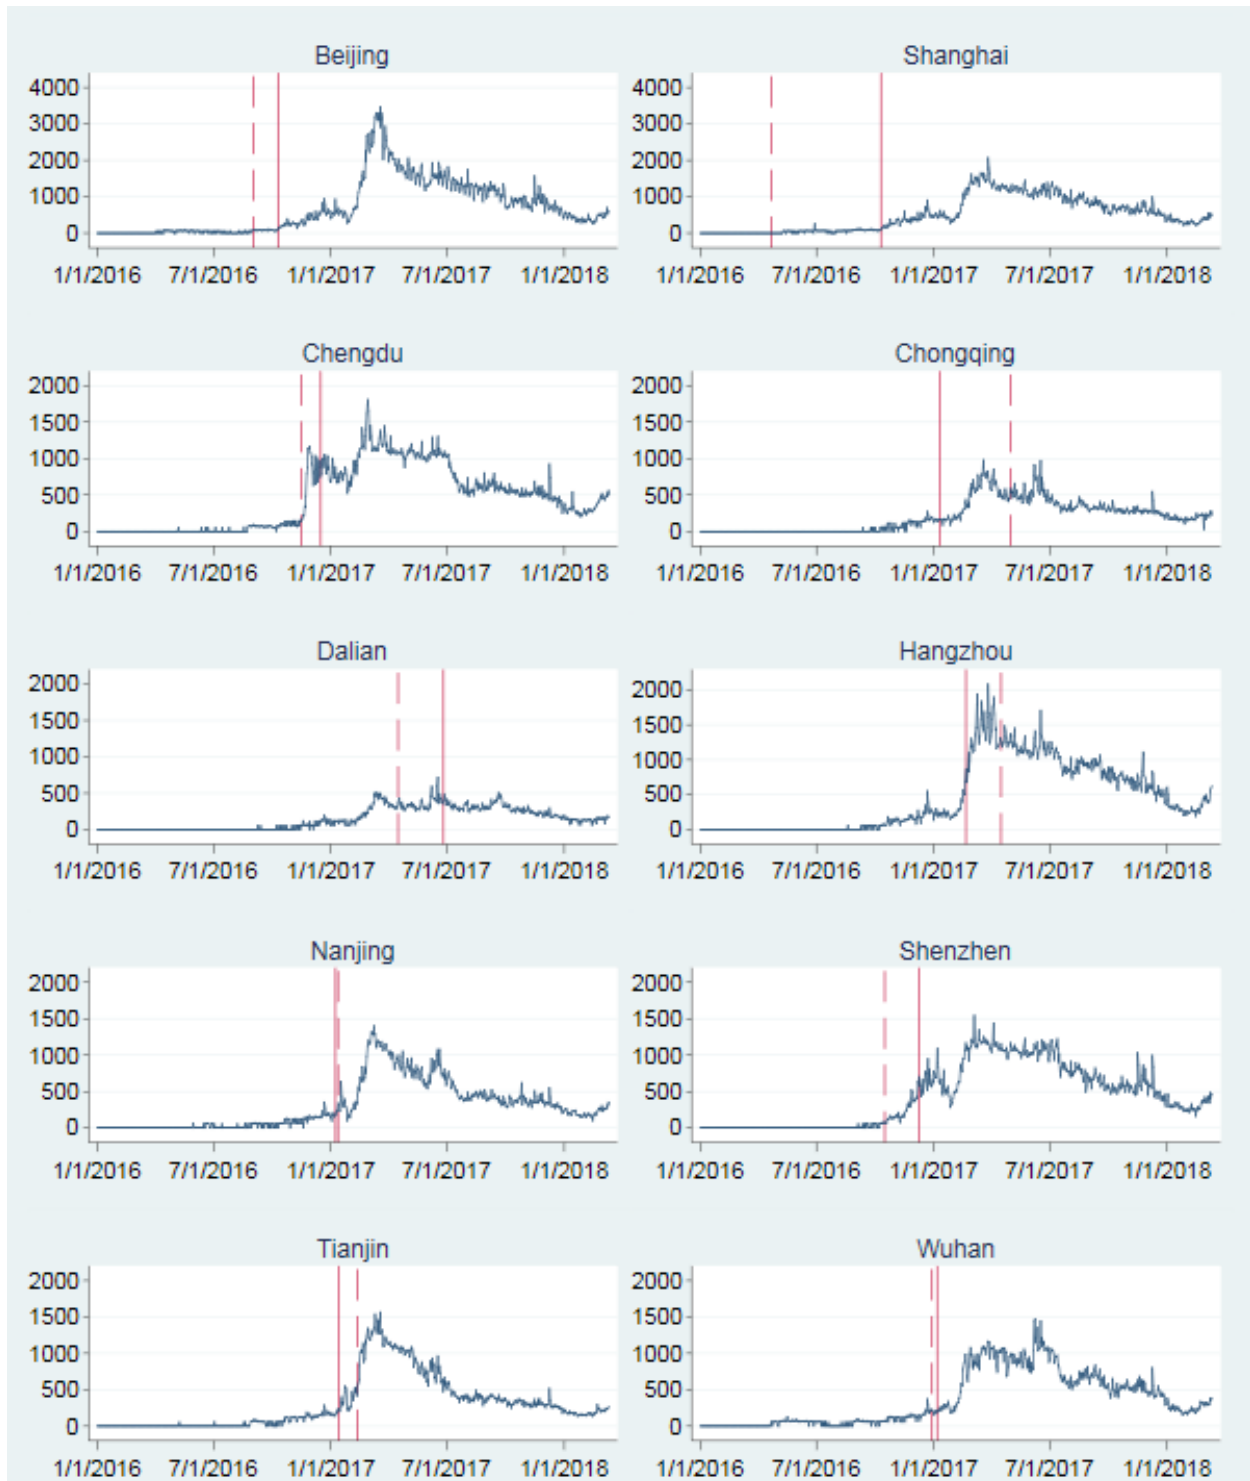

*Notes:* Blue curves depict daily Baidu search index for “bike sharing” from January 1, 2016 to March 12, 2018 by city (indices prior to 2016 all equal zero). Red solid lines represent entry time of Ofo and red dashed lines represent entry time of Mobike.

**Figure B3. Housing Price Gradient: Non-parametric Estimates**

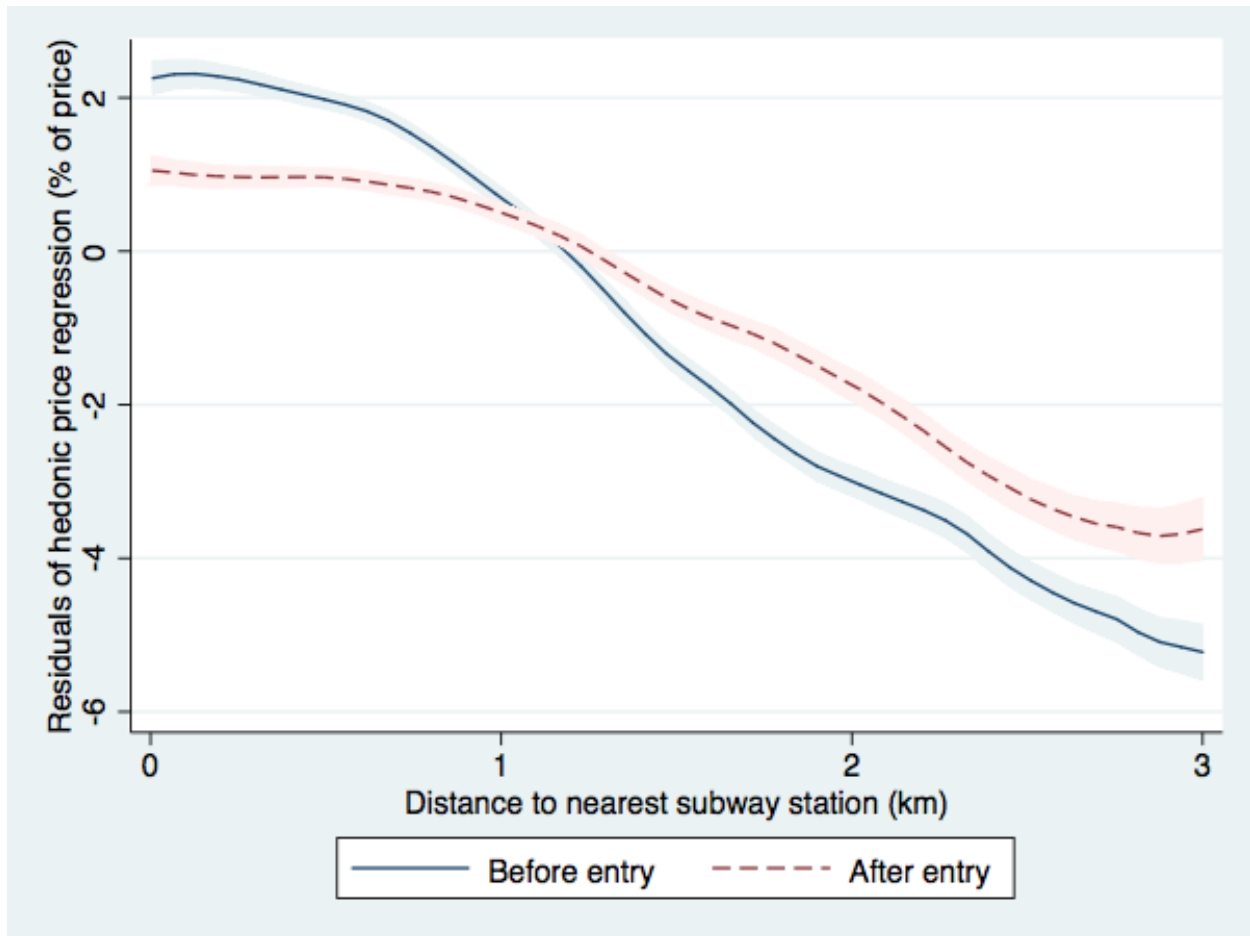

*Notes:* The plot depicts hedonic price residuals from estimating model (1) against distance to the nearest subway station, before and after the entry of bike sharing. We estimate model (1) on logarithm of housing price per m<sup>2</sup> against subway-station fixed effects, city-year-month fixed effects, and apartment characteristics (apartment floor number, size, building age, number of bedrooms, apartment density, whether in a school district, decoration status, window directions, and indicators for initial/last price), using apartments initially listed from mid-2015 to 2017, within 3 km of the nearest subway station. Blue solid line and red dashed line represent non-parametric estimates of the hedonic price residuals as a smooth function of distance, for apartments listed before and after the entry of bike sharing, respectively. The shadows represent the 95% confidence intervals.

**Figure B4. Monthly Average Prices of Resale and Rental Apartments in Beijing**

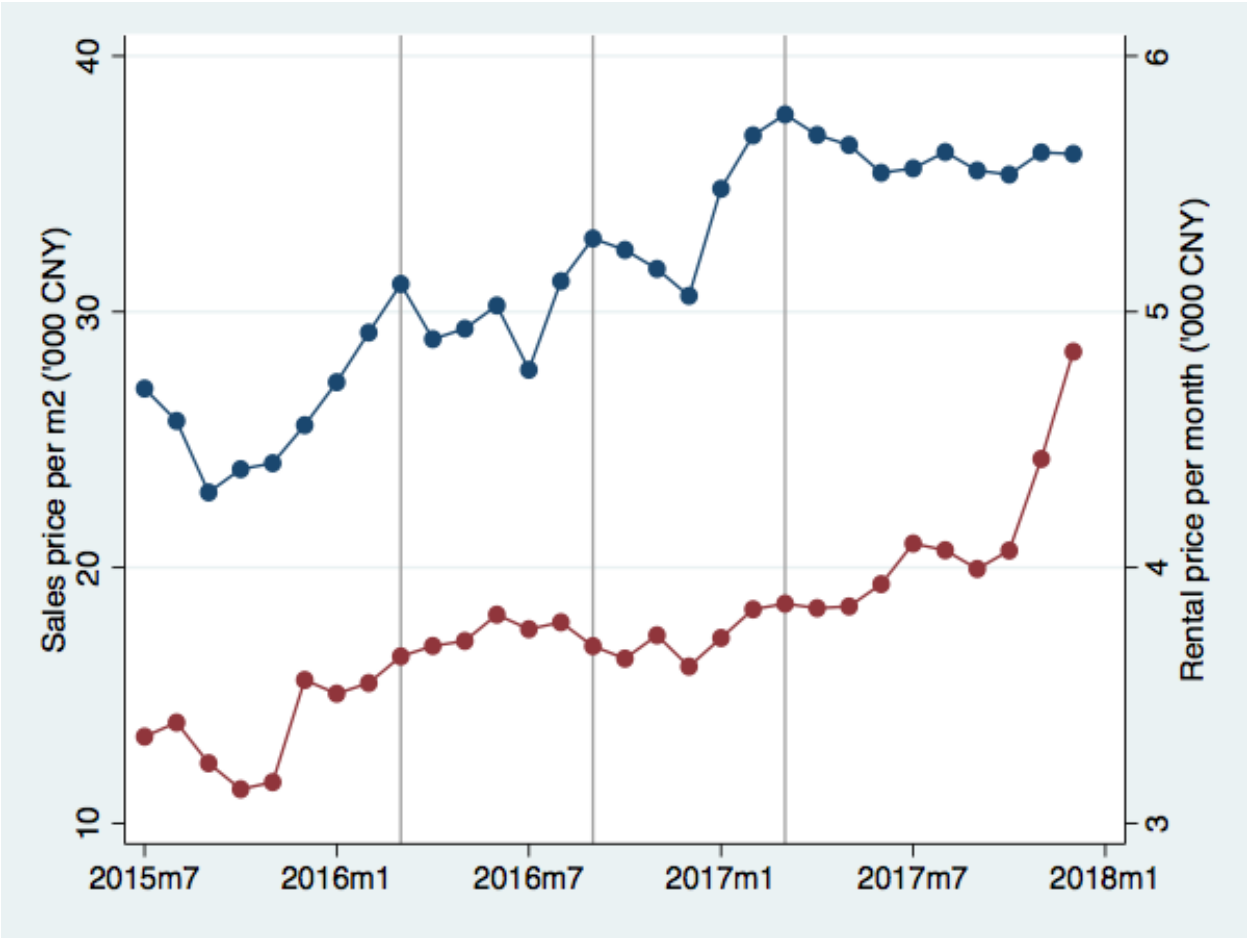

*Note:* Samples comprise rental and resale apartments initially listed from mid-2015 to 2017, within 3 km of the nearest subway station. The blue dots depict the average price per m<sup>2</sup> of resale apartments in each month; the red dots depict the average rents per month of rental apartments. The grey vertical lines represent the housing market regulations on March 25, 2016, September 30, 2016, and March 20, 2017, respectively.

## Online Appendix C. Back-of-the-envelope Calculation of Commuting Cost Reduction

The calculation method is as follows: (1) for each apartment listed after the entry, we use the estimates in Table 2, Column (a) to obtain the predicted total price (predicted price per  $m^2 \times$  apartment size) and the counterfactual total price assuming no entry of bike sharing; and (2) we treat the difference between the predicted and counterfactual total prices as the total reduction in commuting costs, and amortize it into 30, 40, 50, 60 and 70 years of annual values. Columns (a) and (b) use the compound interest rate for 5-year fixed deposits (2.86% per annum) and 5-year treasury bills (3.86% per annum) as discount factors, respectively. Exchange rate between CNY and USD is 6.7:1.

**Table C1. Reduction in Commuting Costs per Annum**

| Discount duration | (a) 2.86% per annum   | (b) 3.86% per annum   |
|-------------------|-----------------------|-----------------------|
| 30 years          | 1,893 CNY, or 282 USD | 2127 CNY, or 317 USD  |
| 40 years          | 1,597 CNY, or 238 USD | 1,851 CNY, or 276 USD |
| 50 years          | 1,429 CNY, or 213 USD | 1,700 CNY, or 254 USD |
| 60 years          | 1,324 CNY, or 198 USD | 1,610 CNY, or 240 USD |
| 70 years          | 1,255 CNY, or 187 USD | 1,554 CNY, or 232 USD |

**Figure C1. Counterfactual Prices without Bike Sharing**

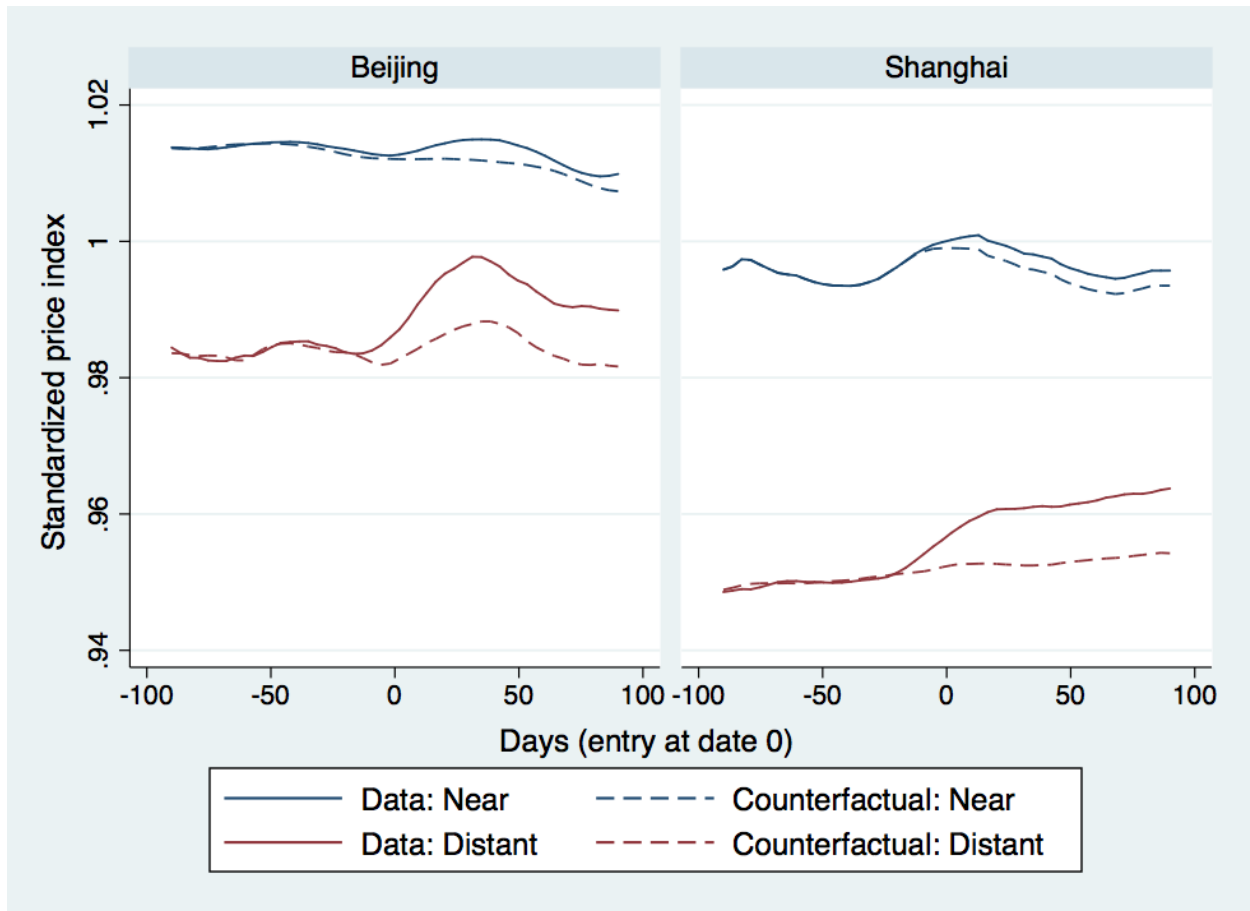

*Note:* Samples comprise apartments in Beijing and Shanghai, listed 90 days before and after the entry of bike sharing. The figure plots housing price residuals from Equation (1), smoothed by local polynomial regressions and absent from subway-station fixed effects and city-year-month fixed effects.
